# Supplementary material for: Basophil activation test discriminates between allergy and tolerance in peanut-sensitized children
Source: PubMed Central journal article supplement (PMC4164910; doi:10.1016/j.jaci.2014.04.039), 2014-09
Supplement: mmc3.pdf [file mmc3.pdf]

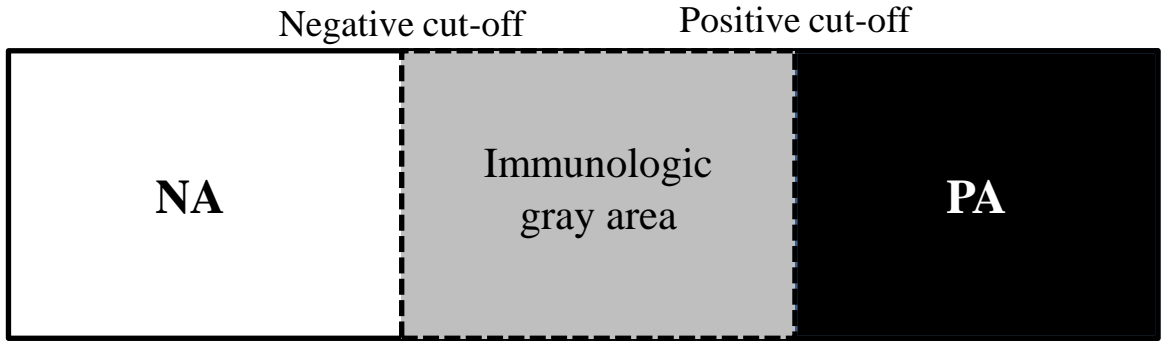

|                |                         |                        |
|----------------|-------------------------|------------------------|
| SIgE to peanut | 0.35 KU <sub>A</sub> /L | 15 KU <sub>A</sub> /L  |
| SPT to peanut  | 3 mm                    | 8 mm                   |
| Ara h 2-sIgE   | 0.1 KU <sub>A</sub> /L  | 1.0 KU <sub>A</sub> /L |

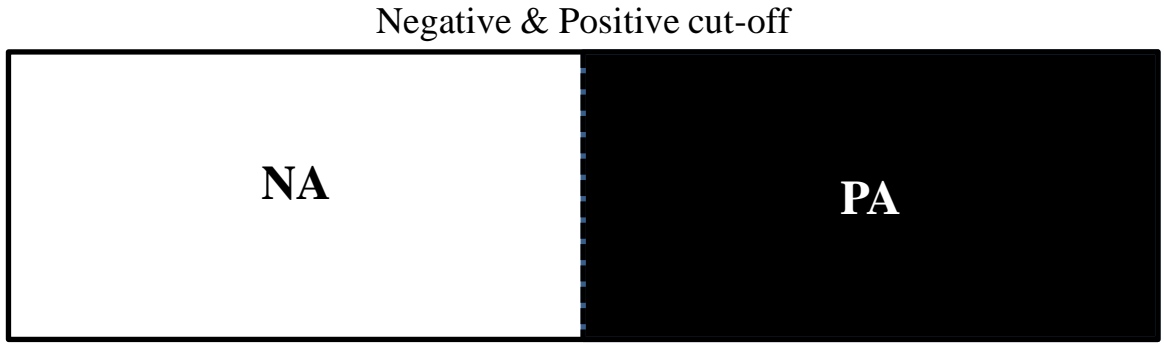

BAT to peanut                      4.78% CD63<sup>10-100</sup>
