# Supplementary material for: Basophil activation test discriminates between allergy and tolerance in peanut-sensitized children
Source: PubMed Central journal article supplement (PMC4164910; doi:10.1016/j.jaci.2014.04.039), 2014-09
Supplement: mmc6.pdf [file mmc6.pdf]

Immediate hypersensitivity reaction to peanut  
N=28 (26.9%)

Eczema  
N=33 (28.8%)

Other food allergy (personal history)  
N=20 (19%)

Previous diagnosis of peanut allergy  
N=3 (2.8%)

Sibling with peanut allergy  
N=2 (1.9%)

Family history of atopy  
N=1 (1%)

No reported symptoms to peanut ingestion  
N=20 (19%)

Suspected peanut allergy  
N=84/104 (80.8%)

Peanut allergy not suspected  
N=20/104 (19%)

NA \*  
N=15 (14.4%)

PS  
N=5 (4.8%)

PA  
N=43 (41.3%)

PS  
N=31 (29.8%)

NA\*  
N=10 (9.6%)
