# Supplementary material for: Basophil activation test discriminates between allergy and tolerance in peanut-sensitized children
Source: PubMed Central journal article supplement (PMC4164910; doi:10.1016/j.jaci.2014.04.039), 2014-09

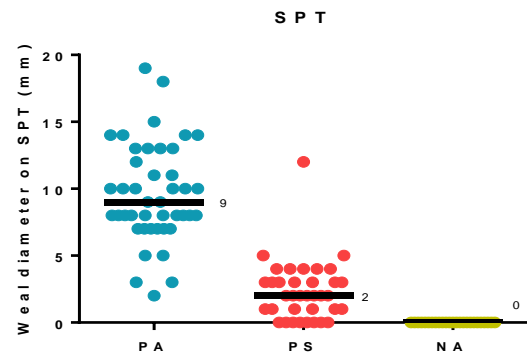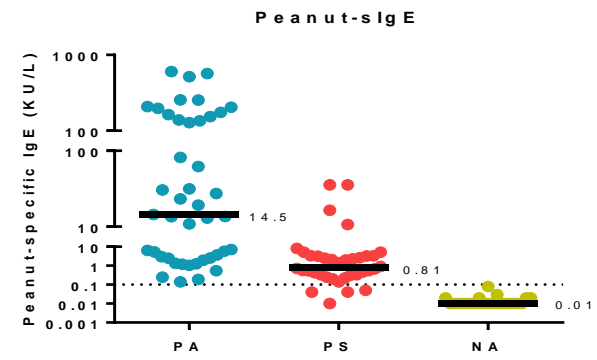

### Specific IgE to peanut components

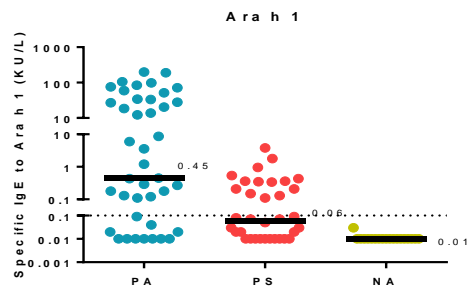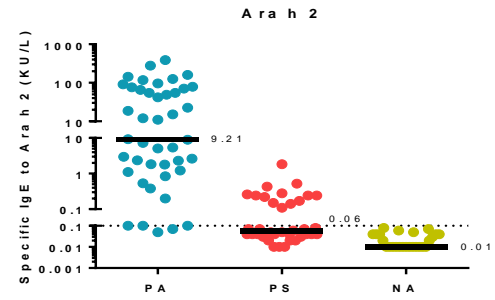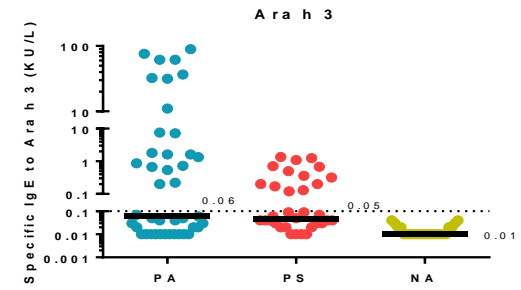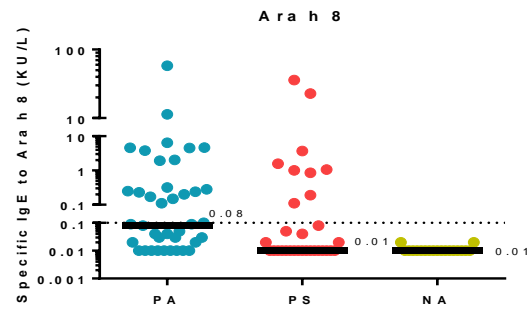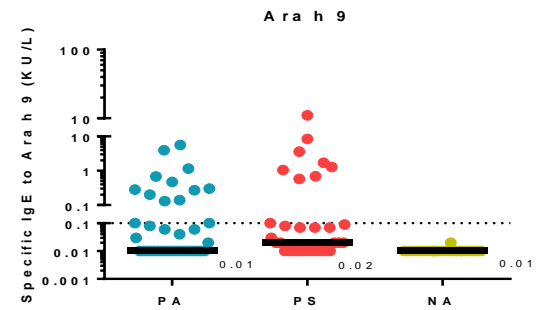

Supplement: mmc7.pdf [file mmc7.pdf]
