# Supplementary material for: Basophil activation test discriminates between allergy and tolerance in peanut-sensitized children
Source: PubMed Central journal article supplement (PMC4164910; doi:10.1016/j.jaci.2014.04.039), 2014-09

Peanut allergic (n=42)

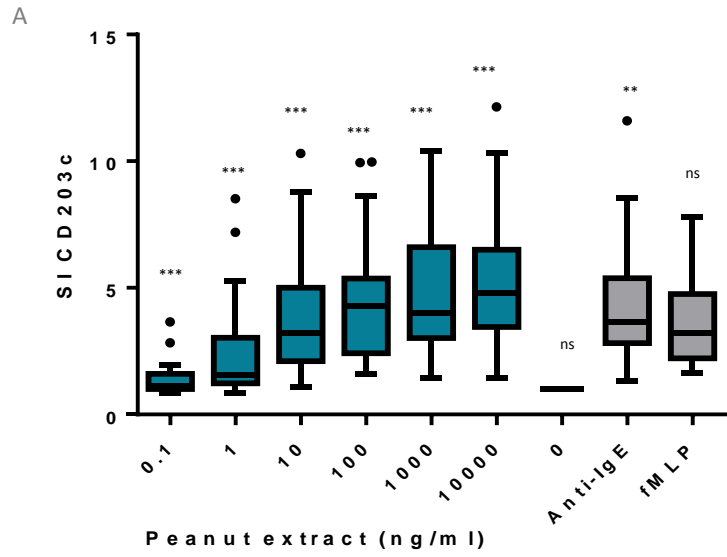

Peanut sensitised tolerant (n=31)

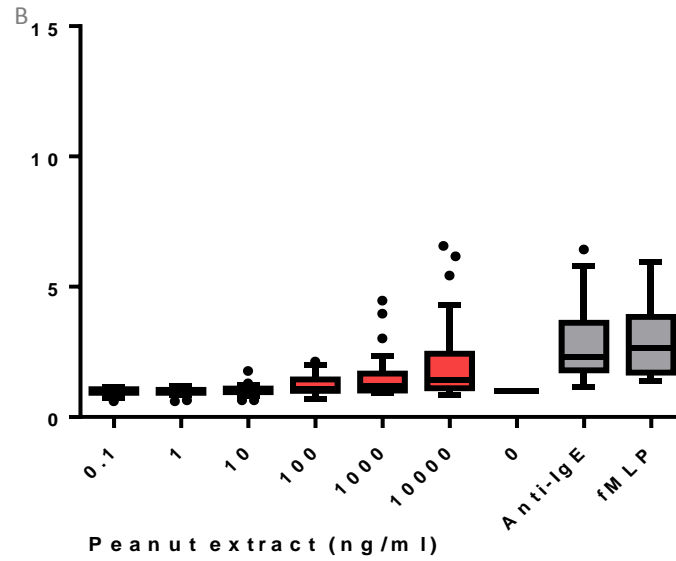

Non sensitised non allergic (n=19)

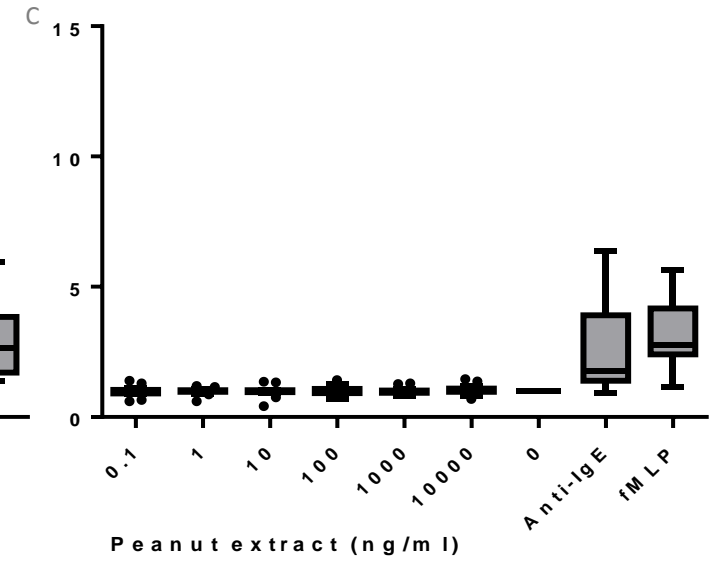

Supplement: mmc8.pdf [file mmc8.pdf]
