# Supplementary material for: Basophil activation test discriminates between allergy and tolerance in peanut-sensitized children
Source: PubMed Central journal article supplement (PMC4164910; doi:10.1016/j.jaci.2014.04.039), 2014-09
Supplement: mmc9.pdf [file mmc9.pdf]

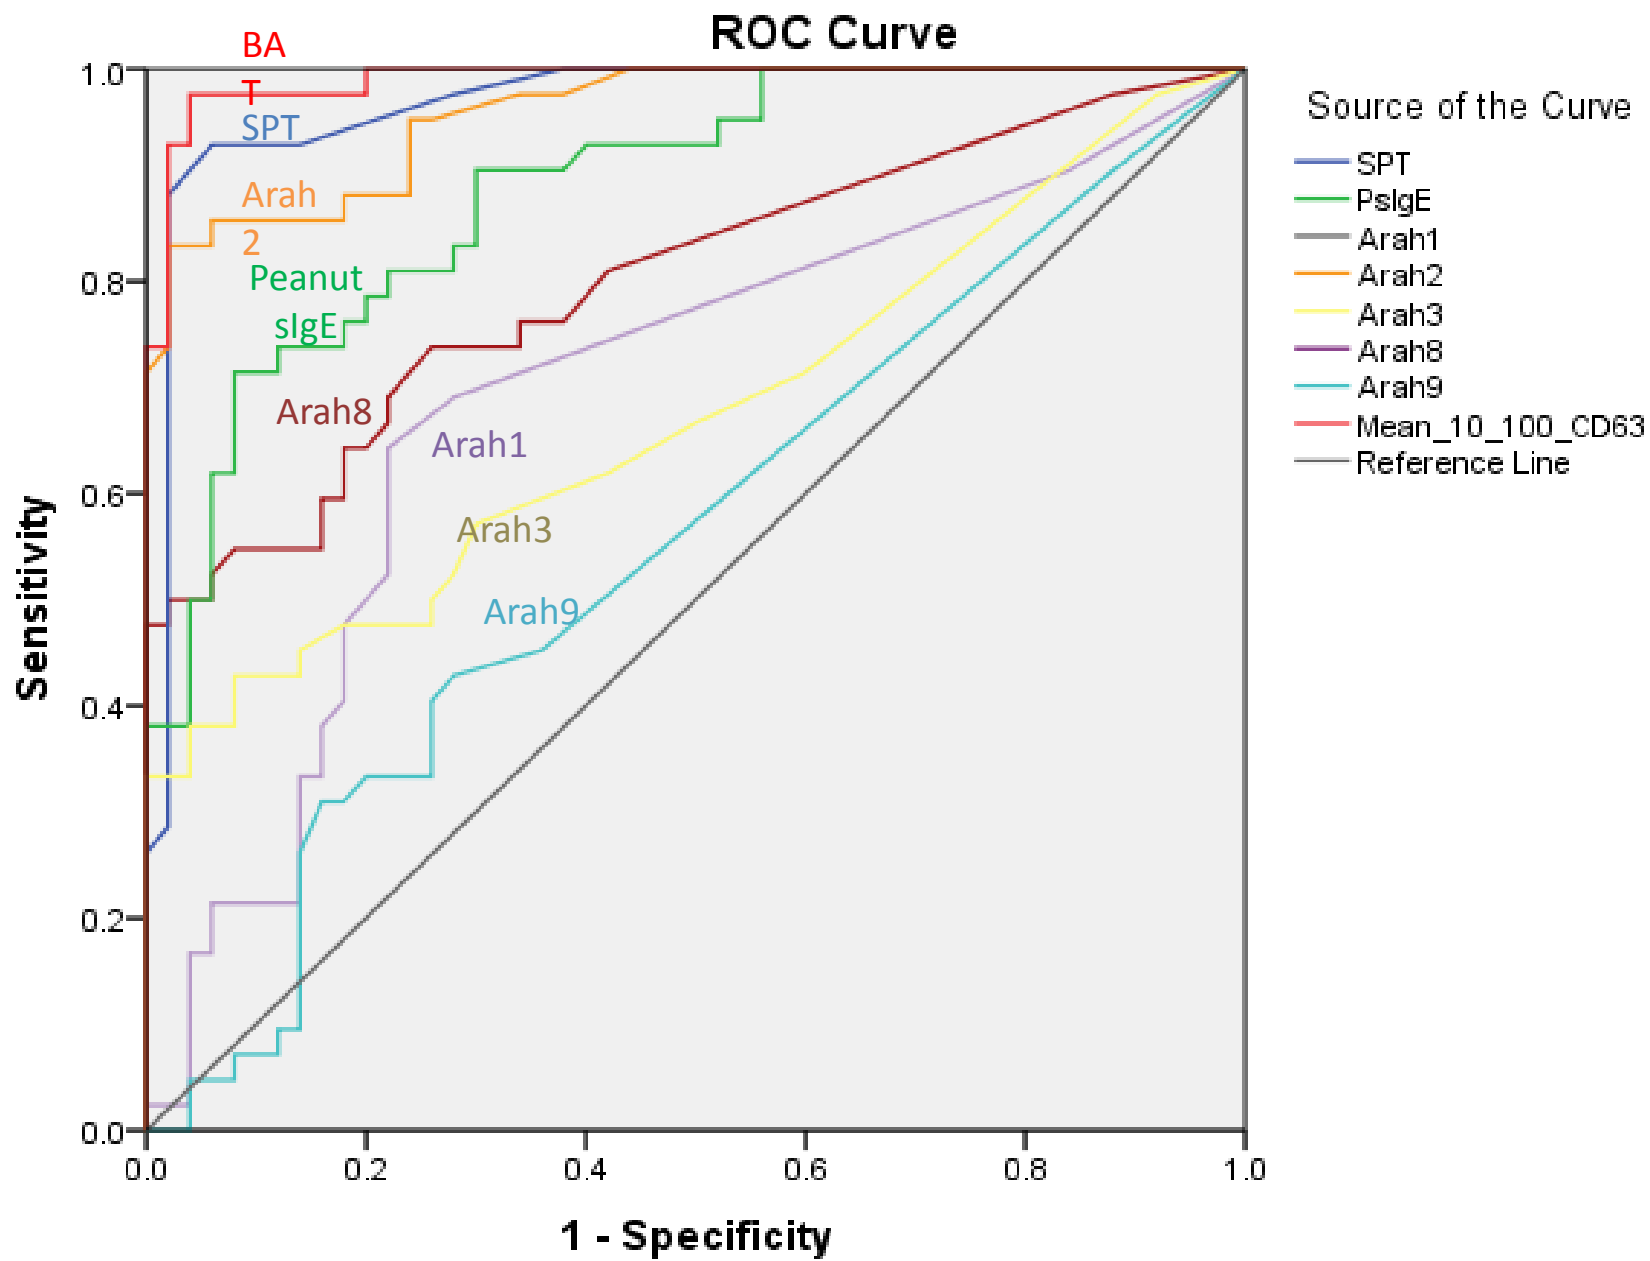

Diagonal segments are produced by ties.
